# Supplementary material for: The Use of Census Migration Data to Approximate Human Movement Patterns across Temporal Scales
Source: PubMed Central journal article supplement (PMC3541275; doi:10.1371/journal.pone.0052971), 2013-01-09

**Rural->Rural**

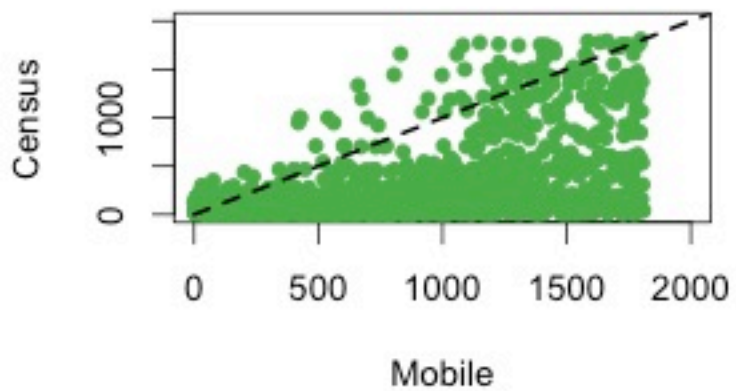

**Rural->Urban**

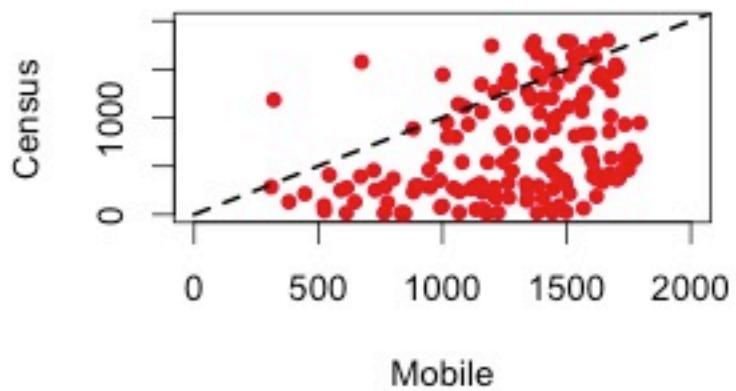

**Urban->Urban**

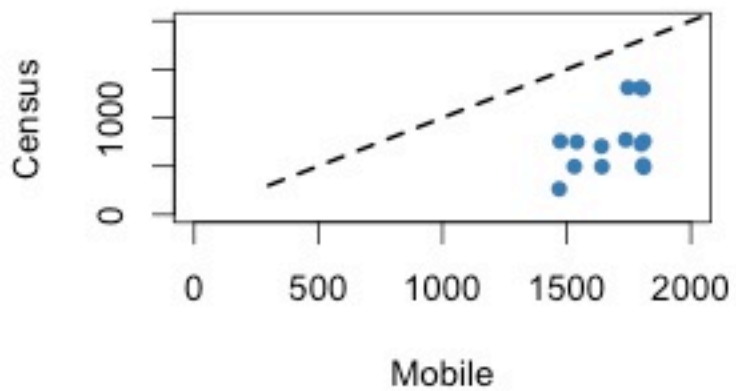

**Urban->Rural**

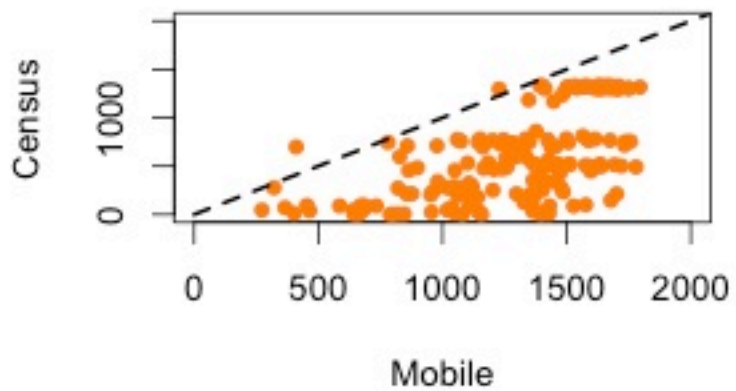

Supplement: pone.0052971.s002.pdf [file pone.0052971.s002.pdf]
