# Supplementary material for: The Use of Census Migration Data to Approximate Human Movement Patterns across Temporal Scales
Source: PubMed Central journal article supplement (PMC3541275; doi:10.1371/journal.pone.0052971), 2013-01-09

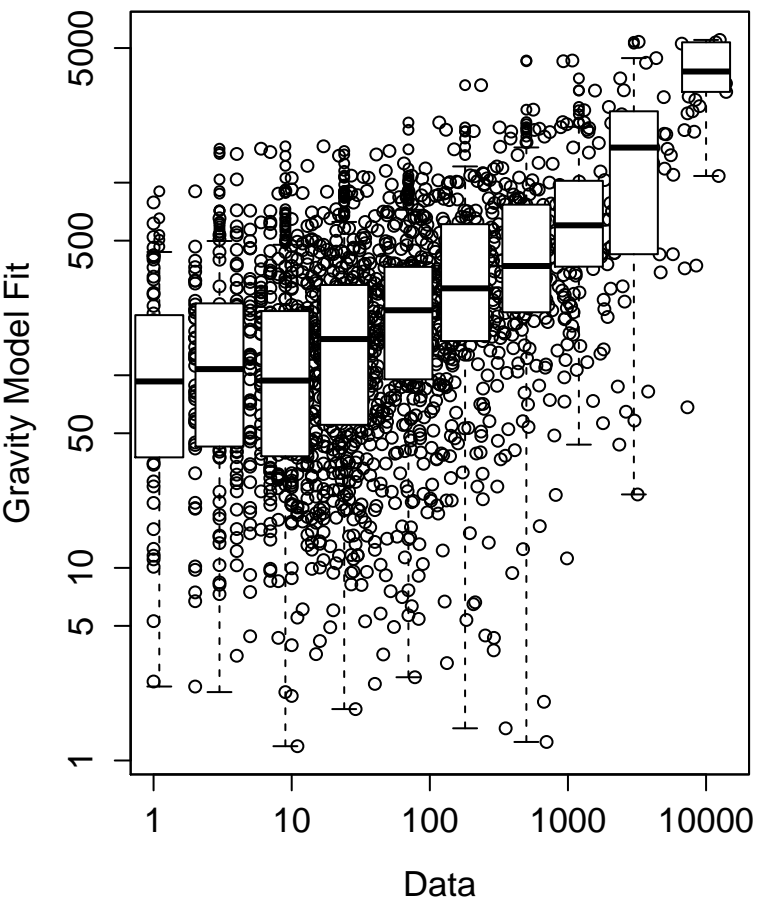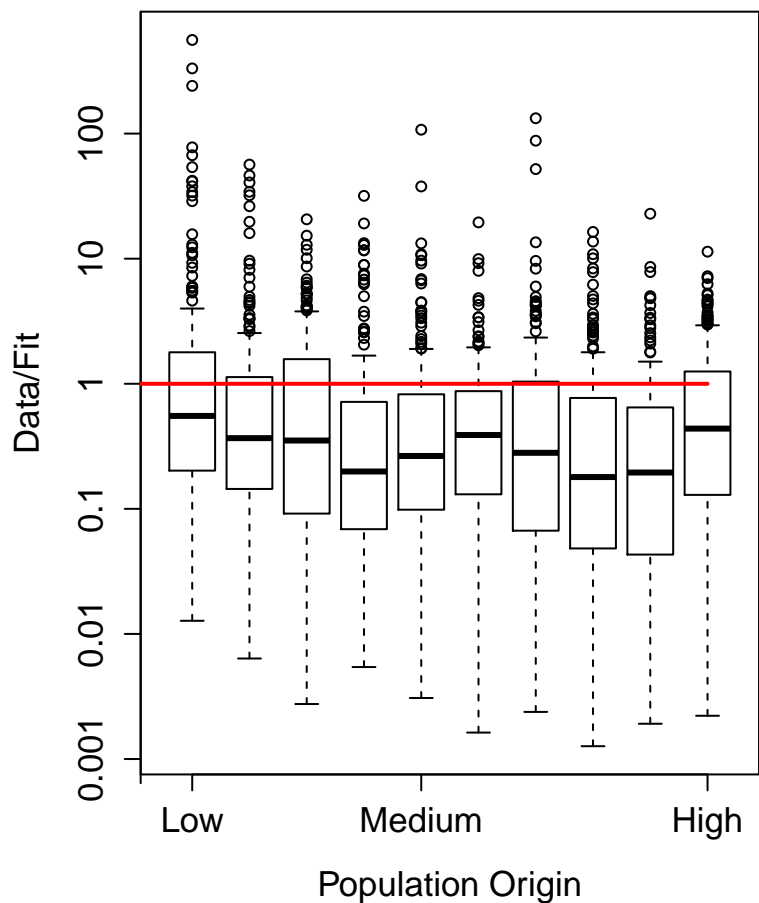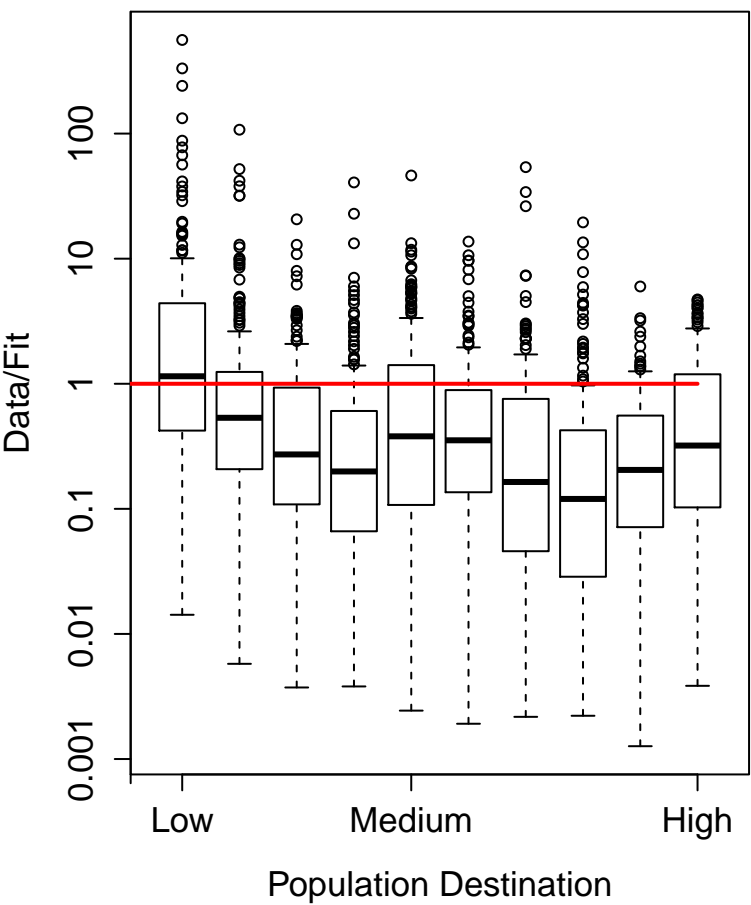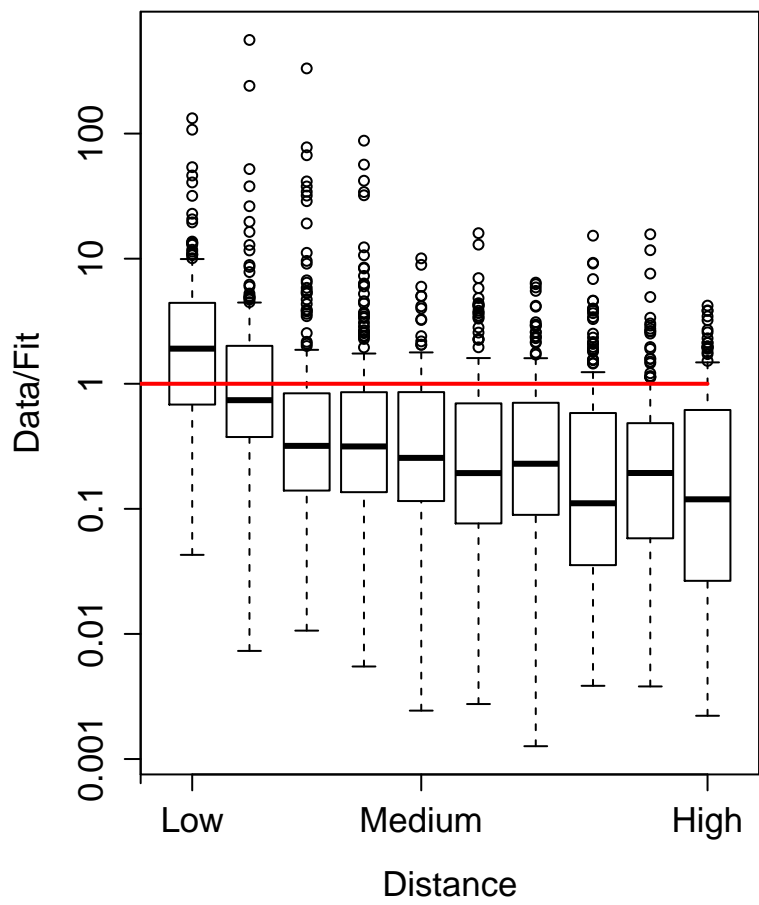

Supplement: pone.0052971.s003.pdf [file pone.0052971.s003.pdf]
